# Supplementary material for: Elimination of Vitamin D Signaling Causes Increased Mortality in a Model of Overactivation of the Insulin Receptor: Role of Lipid Metabolism
Source: MDPI journal article supplement (doi:10.3390/nu14071516), 2022-04-05

Supplementary tables

Supplementary Table S1. PCR oligonucleotides.

| Gene                       | Sequence                          |
|----------------------------|-----------------------------------|
| <b>PTEN</b>                | FWD: CAAGCACTCTGCGAACTGAG         |
|                            | REV: AAGTTTTTGAAGGCAAGATGC        |
| <b>Cre-ER<sup>TM</sup></b> | FWD: ACGAACCTGGTCGAAATCAGTGCG     |
|                            | REV: CGGTGCATGCAACGAGTGATGAG      |
| <b>VDR wt</b>              | FWD: TTTGGCCTTTCTGCTTGCCTCTTC     |
|                            | REV: TCAGTTGATATCCCTGGGAGGC       |
| <b>VDR LoxP</b>            | FWD: TTTGGCCTTTCTGCTTGCCTCTTC     |
|                            | REV: AGCGACACTCTTGGTCTGGTTCC      |
| <b>ΔPTEN excised</b>       | FWD: ACTCAAGGCAGGGATGAGC          |
|                            | REV1: AATCTAGGGCCTCTTGTGCC        |
|                            | REV2: GCTTGATATCGAATTCCTGCAGC     |
| <b>ΔVDR excised</b>        | FWD: CACAACAGTCAGAGGCAGTAAGCAAAGC |
|                            | REV1: AGCGACACTCTTGGTCTGGTTCC     |

Supplementary Table S2. Real time qPCR primers.

| Gene          | Sequences                        | bp  | ID             |
|---------------|----------------------------------|-----|----------------|
| <b>TBP</b>    | FWD: AAA ATG GTG TGC ACA GGA GCC | 141 | NM_013684.3    |
|               | REV: CAC ATC ACA GCT CCC CAC CAT |     |                |
| <b>CEBPA</b>  | FWD: GTGGAGACGCAACAGAAGGT        | 136 | NM_001287514.1 |
|               | REV: CCTTGACCAAGGAGCTCTCA        |     | NM_007678.3    |
| <b>PEPCK</b>  | FWD: CCAGTGCCCCATTATTGAC         | 249 | NM_011044.3    |
|               | REV: CCGAAGTTGTAGCCGAAGAA        |     |                |
| <b>G6PC</b>   | FWD: ACTTTCCCCACCAGGTCGT         | 169 | NM_008061.4    |
|               | REV: ACCCCTAGCCCTTTTAGTAGCA      |     |                |
| <b>PGC1A</b>  | FWD: GATCACGTTCAAGATCGCCCTAC     | 178 | NM_008904.2    |
|               | REV: TAAATCACACGGCGCTCTTC        |     |                |
| <b>PPARA1</b> | FWD: ATTTGGGCGTATCTCACCG         | 248 | NM_011144.6    |
|               | REV: GGACTTTCCAGGTCATCTGC        |     |                |
| <b>CPT1</b>   | FWD: ACATCGTGAGTGGCGTCCT         | 171 | NM_013495.2    |
|               | REV: GACCCGAGAAGACCTTGACCATA     |     |                |
| <b>ACOX1</b>  | FWD: TAACTTCCTCACTCGAAGCCA       | 283 | NM_015729.3    |
|               | REV: AGTTCCATGACCCATCTCTGTC      |     |                |
| <b>GLUT2</b>  | FWD: TTGTCATCGCCCTCTGCT          | 228 | NM_031197.2    |
|               | REV: CACTCTCTGAAGACGCCAGGAA      |     |                |
| <b>FGF21</b>  | FWD: TGAAGCCAGGGGTCATTCAA        | 203 | NM_020013.4    |
|               | REV: GTTTGGGGAGTCCTTCTGAGG       |     |                |

Supplementary Table S3. Primary and secondary antibodies.

| <b>Protein</b>             | <b>Company</b>          | <b>Cat. Nº</b> | <b>Host</b> | <b>Reactivity</b>  | <b>Dilution</b> |
|----------------------------|-------------------------|----------------|-------------|--------------------|-----------------|
| <b>PTEN</b>                | Cell Signaling          | 9188           | Rabbit      | H,M,R              | 1/1000          |
| <b>VDR</b>                 | Santa Cruz              | sc-1008        | Rabbit      | H,M,R              | 1/1000          |
| <b>pAkt</b>                | Cell Signaling          | 4060S          | Rabbit      | H,M,R              | 1/1000          |
| <b>Akt</b>                 | Santa Cruz              | sc-5298        | Mouse       | H,M,R              | 1/1000          |
| <b>GAPDH</b>               | BioLegend               | 919501         | Mouse       | H,M,R              | 1/1000          |
| <b>anti-mouse IgG-HRP</b>  | Jackson Immuno Research | 115-035-003    | Goat        | Secondary antibody | 1/10.000        |
| <b>anti-rabbit IgG-HRP</b> | Cell Signaling          | 7074           | Goat        | Secondary antibody | 1/10.000        |

Supplementary Figure S1. Mouse genotypes and target protein expressions. The presence of the excised exons (A) or the protein expressions (B) were determined. The relative amount of protein was also quantified (C). \*  $p < 0.05$  vs CNT; \*\*  $p < 0.01$  vs CNT. CNT: Control. VDR-KO: Vitamin D receptor knockout. PTEN-KO: Phosphatase and tensin homolog knockout. DKO: Double knockout.

**A**

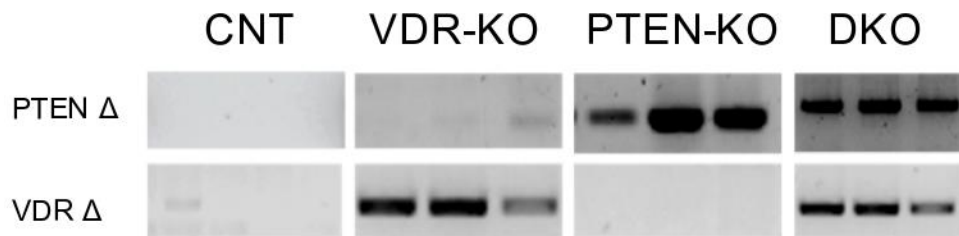

**B**

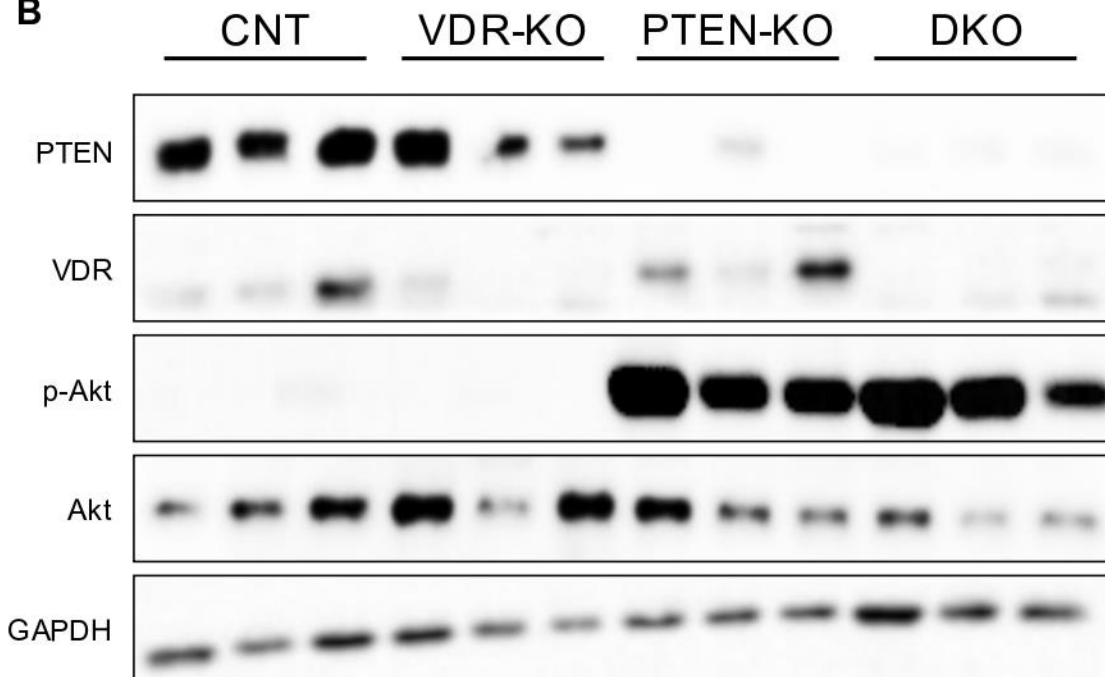

**C**

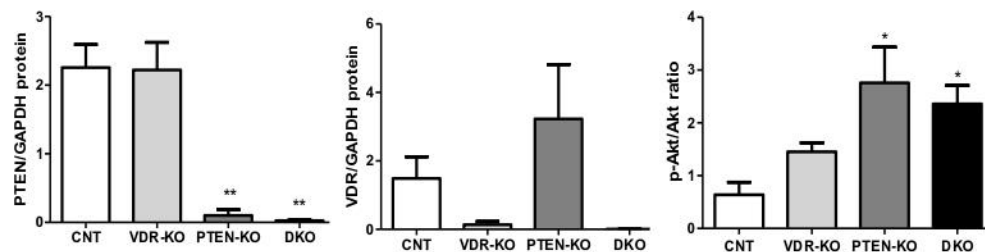

Supplement: s1 [file s1]
